# Supplementary material for: Uropygial gland and bib colouration in the house sparrow
Source: PeerJ. 2016 Jun 2;4:e2102. doi: 10.7717/peerj.2102 (PMC4893339; doi:10.7717/peerj.2102)
Supplement: Table S1 [file peerj-04-2102-s001.docx]

**Table S1**

Raw data of the variables measured in this study. ID indicates the identification codex for each individual. Bib size is in cm2, mass is in g, wing length in mm. UGS is uropygial gland size, measured in mm3. L*, C* and H* are referred to lightness, saturation and hue, respectively.

| ID | Treatment | Bib size | Initial mass | Final mass | Wing length | Initial UGS | Final UGS | Initial L* | Initial C* | Initial H* | Final L* | Final C* | Final H* |
| --- | --- | --- | --- | --- | --- | --- | --- | --- | --- | --- | --- | --- | --- |
| 1M | LPS | 14.391 | 29.000 | 28.400 | 84.000 | 0.091 | 0.076 | 26.450 | 2.125 | 0.432 | 20.300 | 2.021 | 0.301 |
| BG-O | PBS | 13.716 | 27.600 | 26.500 | 81.500 | 0.148 | 0.075 | 11.440 | 0.866 | 1.024 | 16.370 | 1.942 | 0.436 |
| BN-O | LPS | 11.437 | 25.300 | 24.200 | 81.000 | 0.076 | 0.067 | 21.260 | 2.449 | 0.540 | 21.630 | 1.679 | 0.722 |
| BO-WW | LPS | 14.745 | 28.000 | 27.300 | 81.000 | 0.099 | 0.099 | 22.910 | 1.236 | 0.329 | 21.620 | 2.138 | 0.445 |
| BY-O | LPS | 18.531 | 27.500 | 26.900 | 82.000 | 0.120 | 0.082 | 17.510 | 1.946 | 0.818 | 15.860 | 1.427 | 1.026 |
| GG-O | LPS | 16.78 | 25.000 | 23.700 | 79.000 | 0.099 | 0.078 | 18.690 | 1.910 | 0.485 | 19.790 | 2.410 | 0.303 |
| GN-O | LPS | 15.868 | 27.400 | 26.300 | 80.500 | 0.137 | 0.114 | 21.290 | 1.524 | 0.664 | 17.430 | 2.635 | 0.486 |
| GO-WW | PBS | 19.224 | 29.100 | 27.900 | 80.000 | 0.075 | 0.064 | 17.040 | 1.408 | 0.537 | 35.080 | 3.156 | 0.060 |
| GP-O | PBS | 15.537 | 28.400 | 28.300 | 80.500 | 0.114 | 0.076 | 16.400 | 1.998 | 0.401 | 20.420 | 2.255 | 0.320 |
| GR-O | PBS | 15.955 | 27.900 | 27.800 | 82.000 | 0.114 | 0.060 | 15.420 | 1.046 | 1.744 | 25.750 | 1.329 | 0.609 |
| GW-WW | LPS | 12.978 | 22.800 | 23.400 | 76.000 | 0.072 | 0.059 | 19.440 | 3.154 | 0.790 | 21.730 | 3.873 | 0.466 |
| NG-O | PBS | 26.834 | 28.300 | 28.200 | 80.000 | 0.089 | 0.082 | 22.770 | 2.675 | 0.482 | 18.390 | 2.125 | 0.611 |
| NW-O | LPS | 15.4 | 25.400 | 25.600 | 81.000 | 0.087 | 0.085 | 22.710 | 3.298 | 0.330 | 20.850 | 3.444 | 0.409 |
| OR-WW | PBS | 23.446 | 28.800 | 28.100 | 80.500 | 0.129 | 0.103 | 18.650 | 0.966 | 1.457 | 20.110 | 1.529 | 0.566 |
| PB-O | LPS | 18.424 | 25.500 | 25.100 | 79.500 | 0.084 | 0.083 | 22.790 | 2.802 | 0.342 | 25.920 | 2.548 | 0.544 |
| PW-O | PBS | 15.459 | 26.000 | 26.900 | 82.000 | 0.131 | 0.107 | 15.140 | 1.607 | 1.071 | 18.163 | 1.572 | 0.855 |
| PY-O | LPS | 10.535 | 26.400 | 25.700 | 82.000 | 0.101 | 0.096 | 34.760 | 1.231 | 0.976 | 18.610 | 2.396 | 0.544 |
| WB-WW | LPS | 18.032 | 28.500 | 28.100 | 81.000 | 0.078 | 0.094 | 19.270 | 1.268 | 0.908 | 44.920 | 2.695 | 0.707 |
| WG-O | PBS | 20.455 | 26.900 | 26.300 | 80.000 | 0.113 | 0.133 | 28.290 | 2.996 | 0.354 | 28.780 | 1.280 | 0.758 |
| WN-O | PBS | 22.768 | 25.200 | 24.900 | 81.500 | 0.075 | 0.081 | 27.120 | 3.744 | 0.315 | 15.430 | 1.573 | 1.366 |
| WR-O | LPS | 17.911 | 24.300 | 24.000 | 80.000 | 0.102 | 0.123 | 14.107 | 2.682 | 0.174 | 18.140 | 2.706 | 0.383 |
